# Supplementary material for: Beyond the Pandemic Prism: Influence of COVID-19 Priming on Assessments of Child Mental Health
Source: Research Square preprint supplement (doi:10.21203/rs.3.rs-8523481/v1), 2026-01-30
Supplement: Supplementary file 1 [file 66042f2ec931d9e46cc765f1.docx]

Supplementary Materials for

Beyond the Pandemic Prism: Influence of COVID-19 Priming on Assessments of Child Mental Health

Hekmat Alrouh, Hannah Dorsman, Michiel Luijten, Hedy van Oers, Jacintha M. Tieskens, Emma Broek, Rowdy de Groot, Helen Klip, Arne Popma, Wouter Staal, Tinca J.C. Polderman, Meike Bartels, Josjan Zijlmans

Corresponding author: [h.alrouh@vu.nl](mailto:h.alrouh@vu.nl)


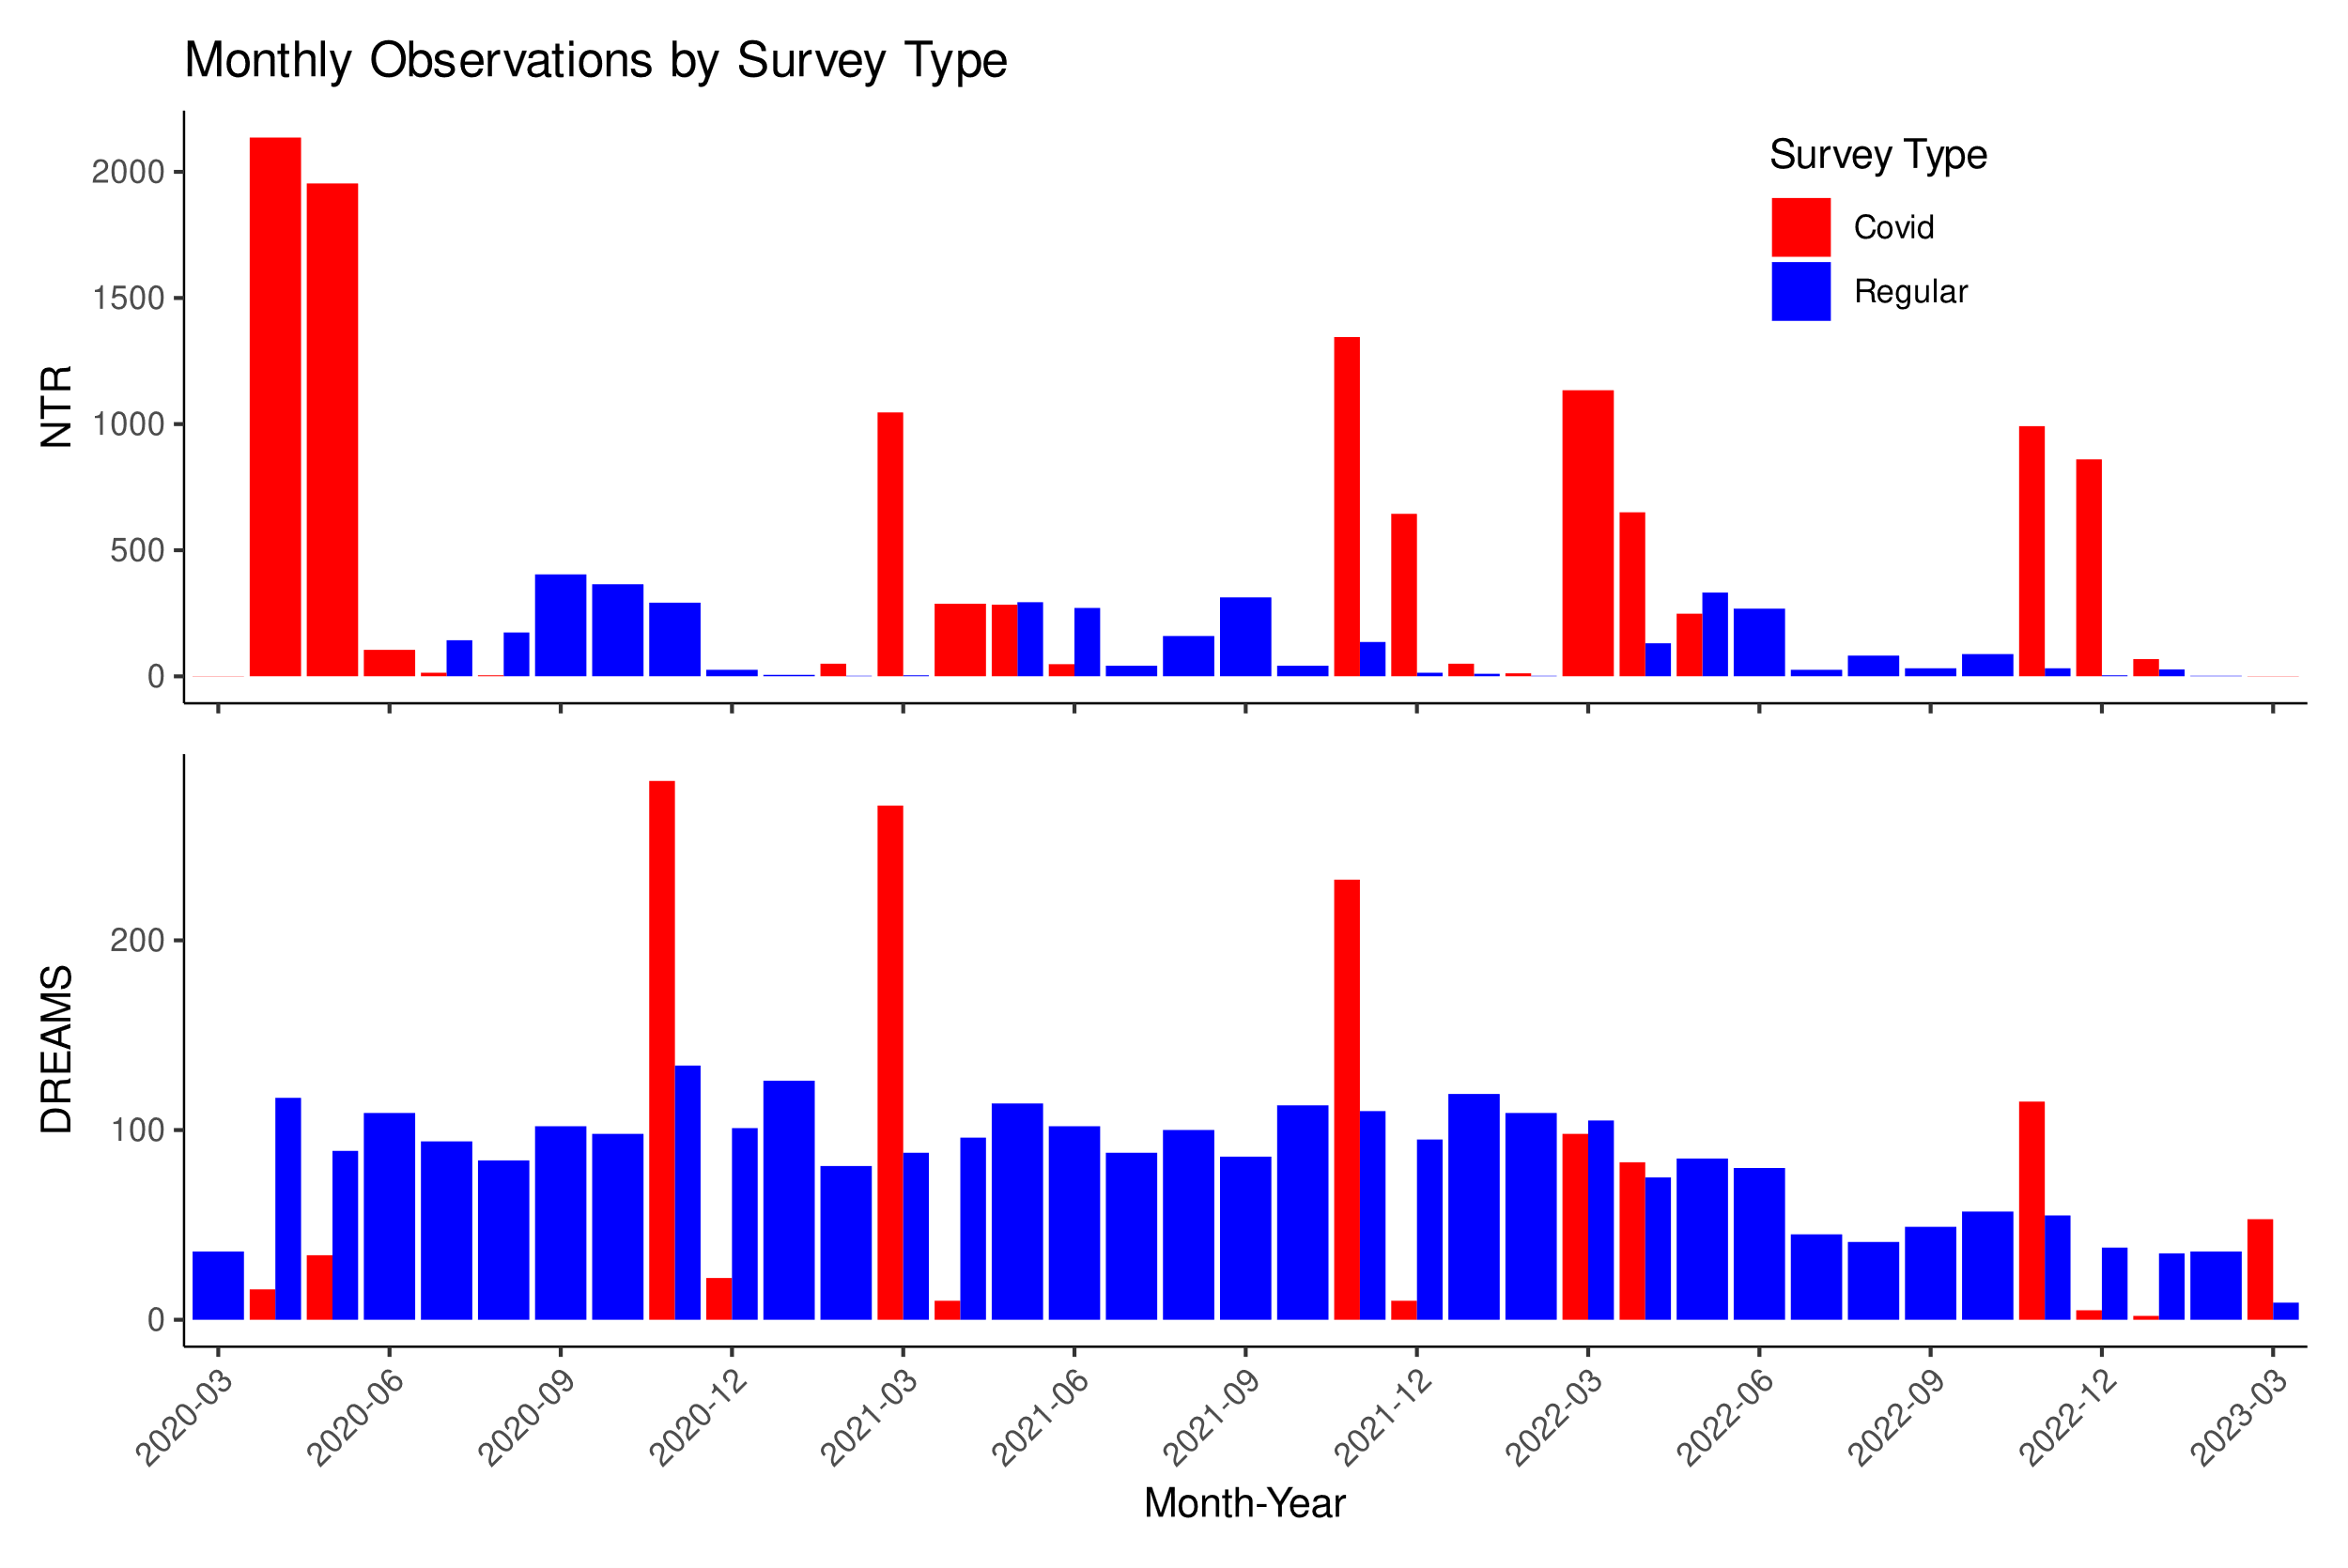


Fig. S1.

Data collection timeline.


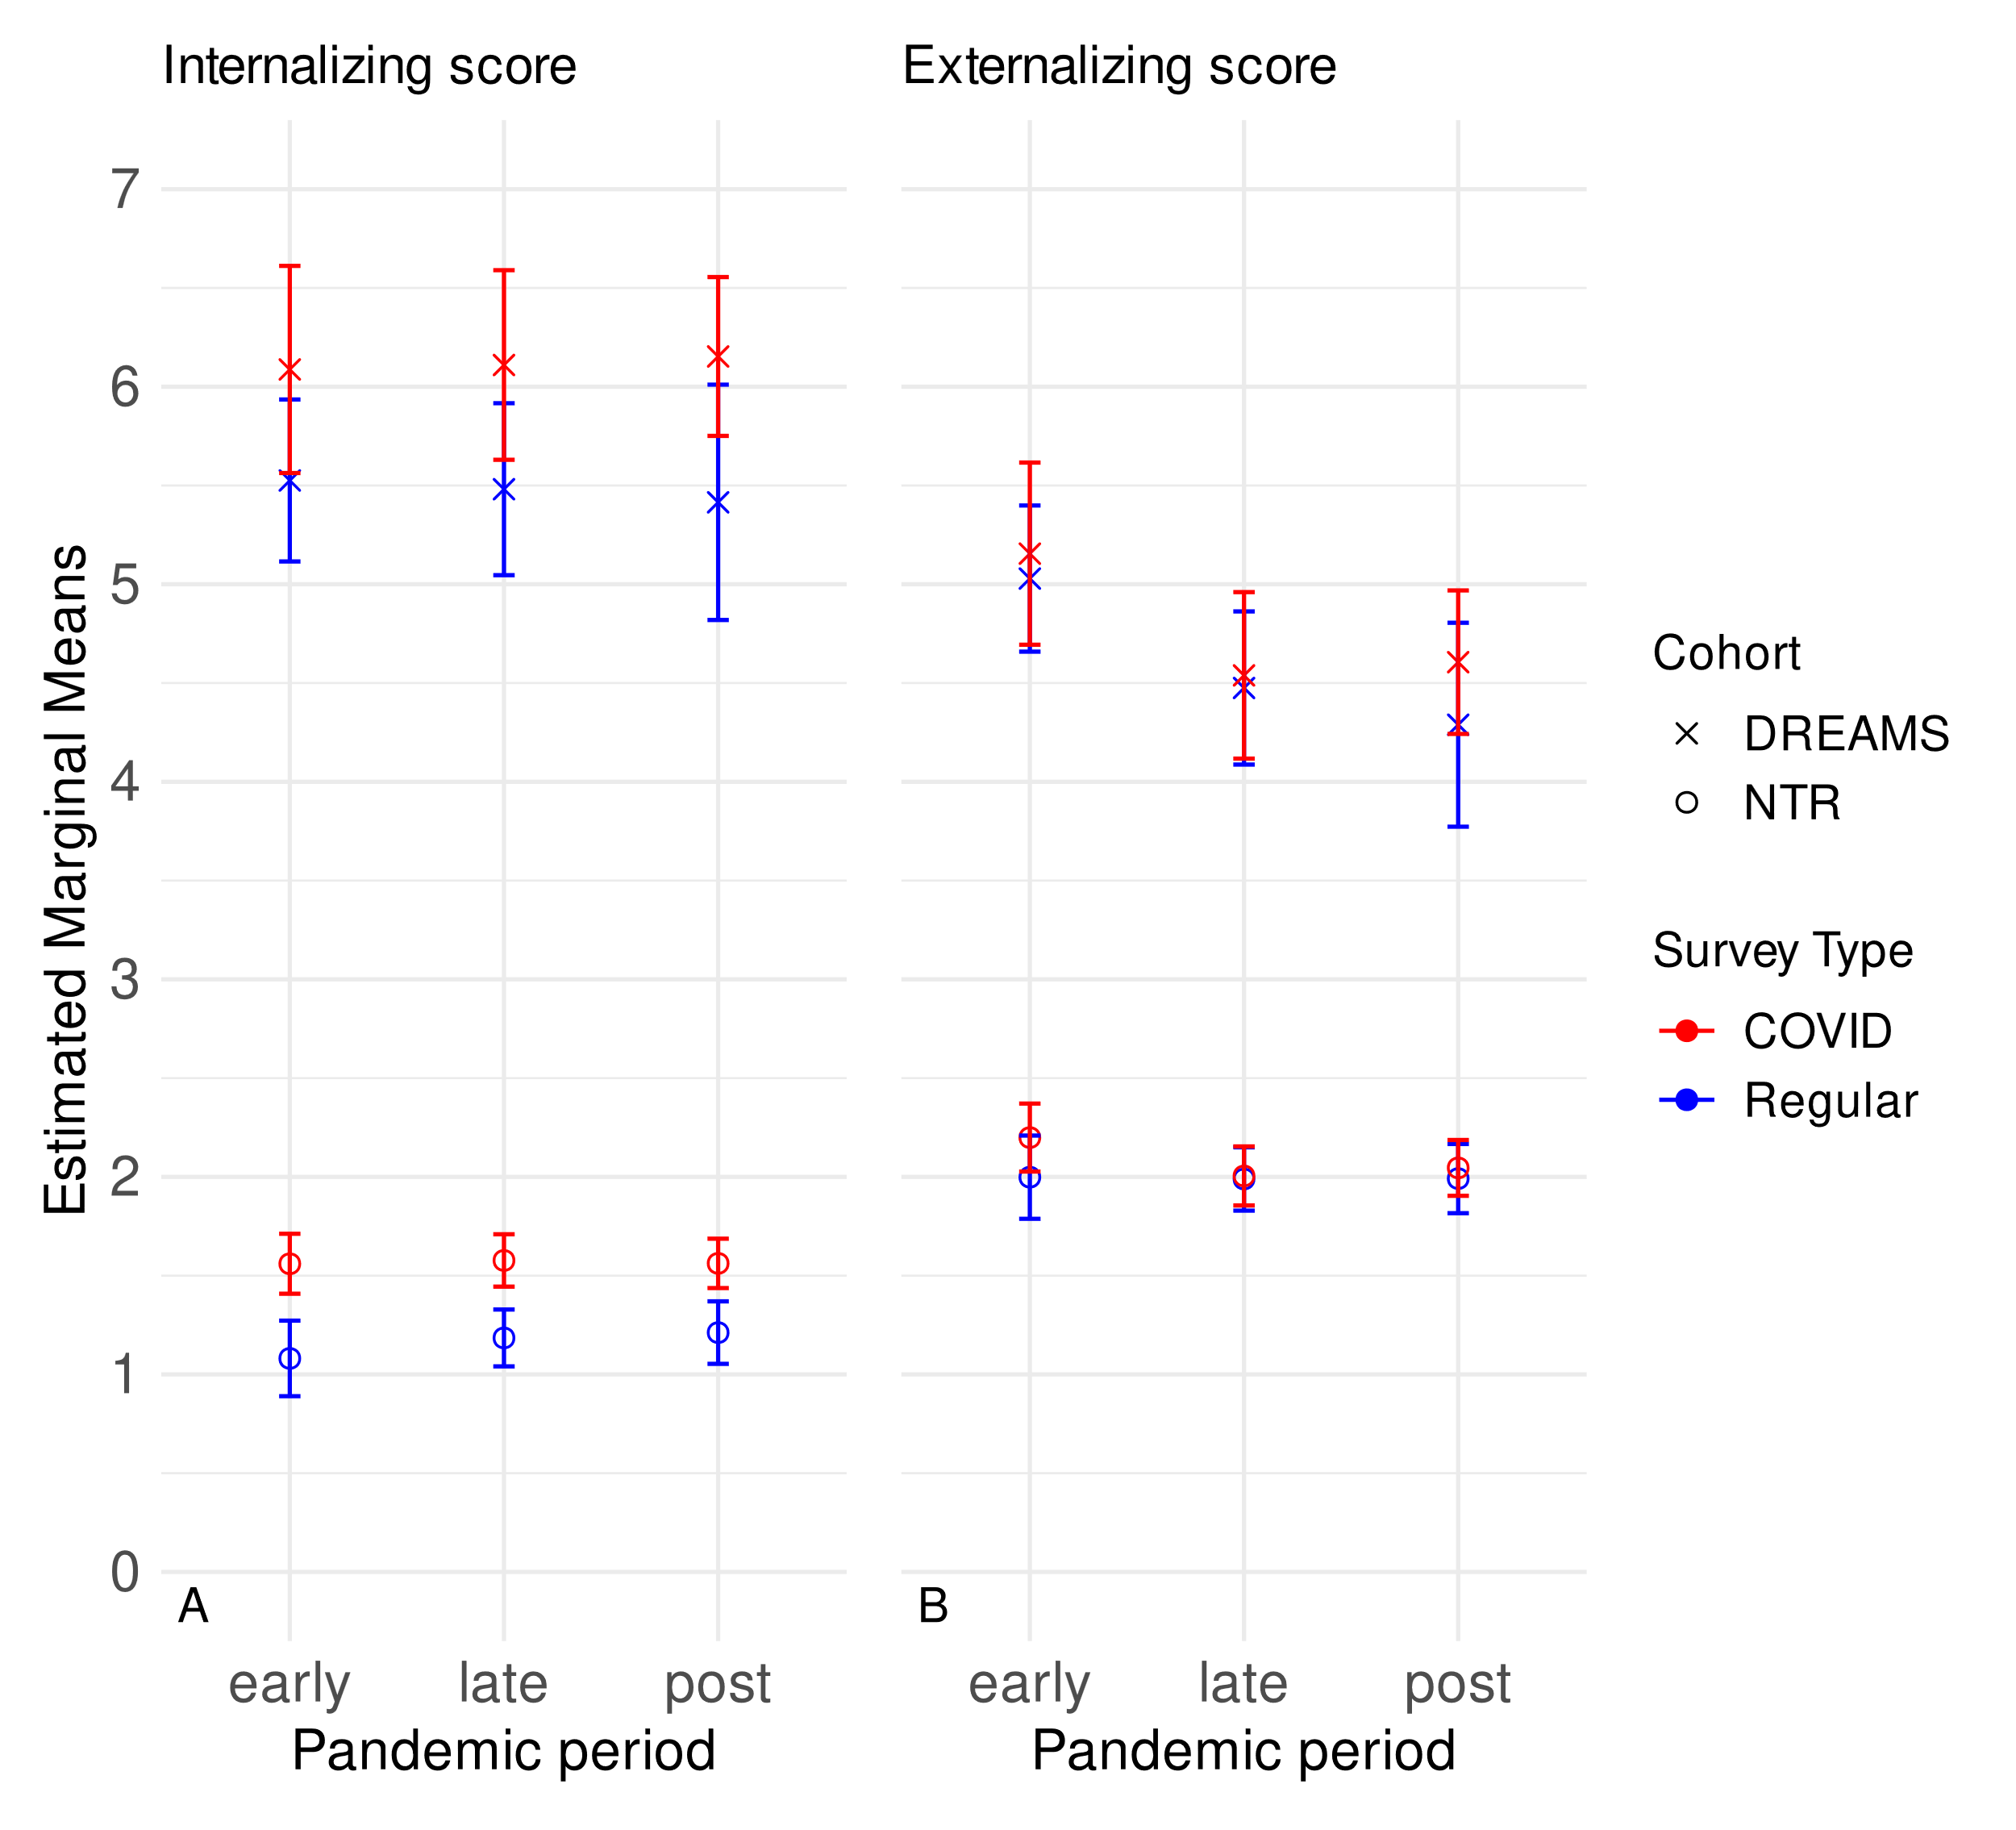


Fig. S2.

Sensitivity analysis results: Estimated marginal means for A) internalizing and B) externalizing scores by period, grouped by survey type for each cohort. Error bars: 95% CI.


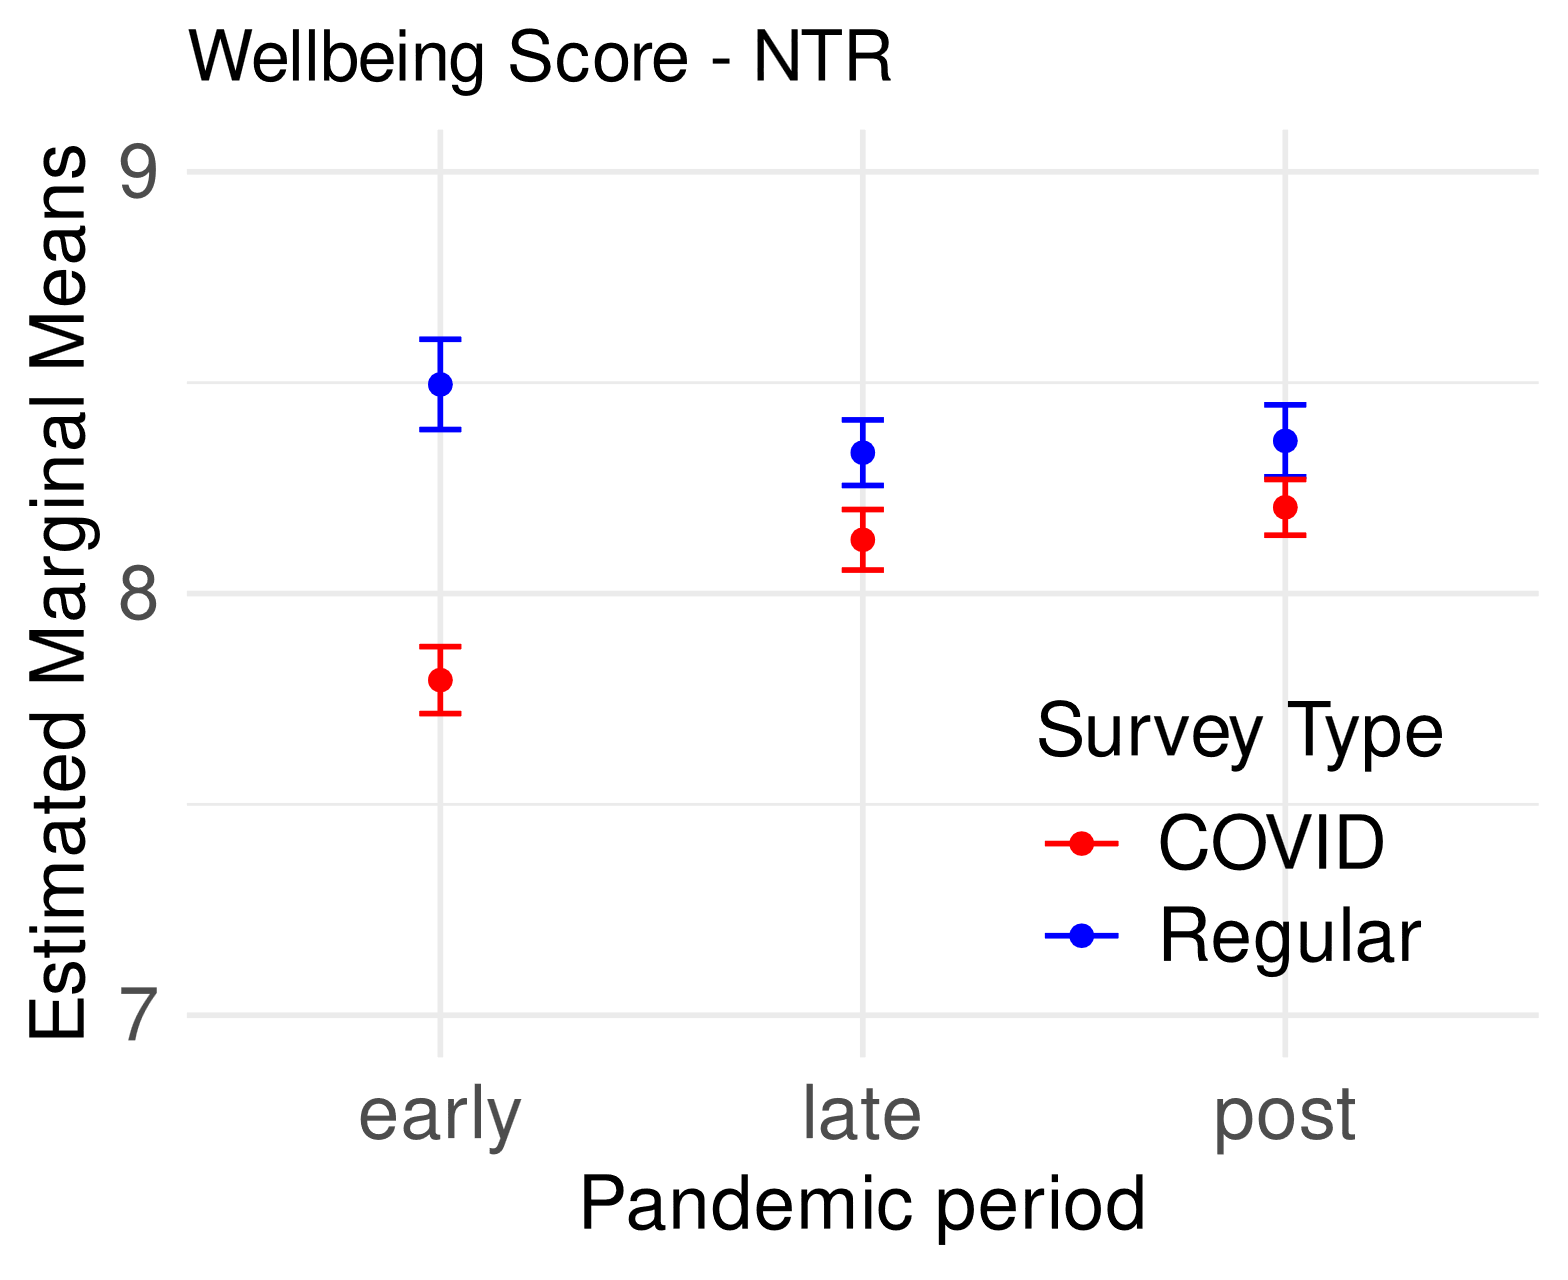


Fig. S3.

Sensitivity analysis results: Estimated marginal means for wellbeing scores (NTR cohort) by period, grouped by survey type. Error bars: 95% CI.

Table S1.

results of the linear mixed models sensitivity analysis.

| NTR | Internalizing problems | | Externalizing problems | | Wellbeing | | |
| --- | --- | --- | --- | --- | --- | --- | --- |
| Estimate (95% CI) | p-value | Estimate (95% CI) | p-value | Estimate (95% CI) | p-value |
| Intercept | **0.84 (0.32 – 1.35)** | 0.0016 | **3.09 (2.51 – 3.68)** | <0.0001 | **8.95 (8.68 – 9.23)** | <0.0001 |
| Survey: COVID-19 | **0.48 (0.31 – 0.65)** | <0.0001 | **0.2 (0.02 – 0.38)** | 0.0267 | **-0.7 (-0.8 – -0.6)** | <0.0001 |
| Period: late-pandemic | 0.1 (-0.09 – 0.29) | 0.283 | -0.01 (-0.21 – 0.19) | 0.93 | **-0.16 (-0.27 – -0.05)** | 0.0048 |
| Period: post-pandemic | 0.13 (-0.08 – 0.34) | 0.2304 | -0.01 (-0.24 – 0.22) | 0.9523 | **-0.13 (-0.26 – -0.01)** | 0.0331 |
| Sex: female | **0.17 (0 – 0.34)** | 0.0478 | **-0.38 (-0.57 – -0.18)** | 0.0001 | 0.03 (-0.03 – 0.1) | 0.3039 |
| Age (years) | 0.02 (-0.03 – 0.07) | 0.3871 | **-0.08 (-0.13 – -0.03)** | 0.0027 | **-0.05 (-0.07 – -0.02)** | 0.0002 |
| Rater: father | **-0.15 (-0.24 – -0.06)** | 0.0015 | 0.04 (-0.06 – 0.14) | 0.457 | **0.1 (0.05 – 0.16)** | 0.0003 |
| Type: COVID-19*Period: late | -0.09 (-0.31 – 0.13) | 0.4359 | -0.19 (-0.42 – 0.05) | 0.1209 | **0.49 (0.36 – 0.63)** | <0.0001 |
| Type: COVID-19*Period: post | -0.13 (-0.35 – 0.09) | 0.2584 | -0.15 (-0.38 – 0.09) | 0.229 | **0.54 (0.41 – 0.68)** | <0.0001 |
| DREAMS | Internalizing problems | | Externalizing problems | |  |  |
| Estimate (95% CI) | p-value | Estimate (95% CI) | p-value |  |  |
| Intercept | **1.18 (0.05 – 2.31)** | 0.0416 | **7.95 (6.85 – 9.05)** | <0.0001 |  |  |
| Survey: COVID-19 | **0.56 (0.05 – 1.07)** | 0.0307 | 0.13 (-0.29 – 0.54) | 0.5502 |  |  |
| Period: late-pandemic | -0.04 (-0.59 – 0.51) | 0.8748 | **-0.55 (-1.02 – -0.09)** | 0.0198 |  |  |
| Period: post-pandemic | -0.11 (-0.8 – 0.58) | 0.7529 | **-0.74 (-1.32 – -0.16)** | 0.0131 |  |  |
| Sex: female | **1.29 (0.72 – 1.86)** | <0.0001 | **-0.61 (-1.17 – -0.06)** | 0.0307 |  |  |
| Age (years) | **0.32 (0.22 – 0.42)** | <0.0001 | **-0.23 (-0.32 – -0.13)** | <0.0001 |  |  |
| Type: COVID-19*Period: late | 0.07 (-0.71 – 0.84) | 0.8662 | -0.06 (-0.7 – 0.58) | 0.8481 |  |  |
| Type: COVID-19*Period: post | 0.18 (-0.62 – 0.97) | 0.6631 | 0.19 (-0.46 – 0.84) | 0.5655 |  |  |
